# Physics-based predictive simulations to explore the differential effects of motor control and musculoskeletal deficits on gait dysfunction in cerebral palsy: a retrospective case study

**Antoine Falisse<sup>1,\*</sup>, Lorenzo Pitto<sup>1</sup>, Hans Kainz<sup>1</sup>, Hoa Hoang<sup>1</sup>, Mariska Wesseling<sup>1</sup>, Sam Van Rossom<sup>1</sup>, Eirini Papageorgiou<sup>2</sup>, Lynn Bar-On<sup>2,3</sup>, Ann Hallemans<sup>4</sup>, Kaat Desloovere<sup>2</sup>, Guy Molenaers<sup>5,6</sup>, Anja Van Campenhout<sup>5,6</sup>, Friedl De Groot<sup>1</sup>, Ilse Jonkers<sup>1</sup>**

<sup>1</sup>*Department of Movement Sciences, KU Leuven, Leuven, Belgium*

<sup>2</sup>*Department of Rehabilitation Sciences, KU Leuven, Leuven, Belgium*

<sup>3</sup>*Department of Rehabilitation Medicine, Amsterdam Movement Sciences, Amsterdam UMC, VU University Medical Center, Amsterdam, The Netherlands*

<sup>4</sup>*Department of Rehabilitation Sciences and Physiotherapy, University of Antwerp, Antwerp, Belgium*

<sup>5</sup>*Department of Orthopaedic Surgery, UZ Leuven, Leuven, Belgium*

<sup>6</sup>*Department of Development and Regeneration, KU Leuven, Leuven, Belgium*

Correspondence\*:

Antoine Falisse

[antoine.falisse@kuleuven.be](mailto:antoine.falisse@kuleuven.be)

## 2 ABSTRACT

3 Model-based simulations of walking have the theoretical potential to support clinical decision  
4 making by predicting the functional outcome of treatments in terms of walking performance. Yet  
5 before using such simulations in clinical practice, their ability to identify the main treatment targets  
6 in specific patients needs to be demonstrated. In this study, we generated predictive simulations of  
7 walking with a medical imaging based neuro-musculoskeletal model of a child with cerebral palsy  
8 presenting crouch gait. We explored the influence of altered muscle-tendon properties, reduced  
9 neuromuscular control complexity, and spasticity on gait function in terms of joint kinematics,  
10 kinetics, muscle activity, and metabolic cost of transport. We modeled altered muscle-tendon  
11 properties by personalizing Hill-type muscle-tendon parameters based on data collected during  
12 functional movements, simpler neuromuscular control by reducing the number of independent  
13 muscle synergies, and spasticity through delayed muscle activity feedback from muscle force and  
14 force rate. Our simulations revealed that, in the presence of aberrant musculoskeletal geometries,  
15 altered muscle-tendon properties rather than reduced neuromuscular control complexity and  
16 spasticity were the primary cause of the crouch gait pattern observed for this child, which is in  
17 agreement with the clinical examination. These results suggest that muscle-tendon properties  
18 should be the primary target of interventions aiming to restore a more upright gait pattern for this  
19 child. This suggestion is in line with the gait analysis following muscle-tendon property and bone  
20 deformity corrections. The ability of our simulations to distinguish the contribution of different

21 impairments on walking performance opens the door for identifying targeted treatment strategies  
22 with the aim of designing optimized interventions for neuro-musculoskeletal disorders.

23 **Keywords:** computational biomechanics, Hill-type muscle model, human locomotion, magnetic resonance imaging, muscle-tendon  
24 complex, optimal control, spasticity, synergy

## 1 INTRODUCTION

25 Cerebral palsy (CP) is the most common cause of motor disability amongst children, affecting 2 to 3  
26 per 1000 live births in Europe (Surveillance of Cerebral Palsy in Europe (2002)). CP is caused by a  
27 non-progressive lesion in the immature brain that may induce inability to selectively control muscles,  
28 spasticity, and weakness. These deficits undermine walking performance and, over time, lead to secondary  
29 impairments, such as bone deformities and muscle contracture, that may further deteriorate walking  
30 abilities (Gage et al. (2009)). Numerous treatments target these impairments with the aim of improving  
31 walking performance, such as single-event multi-level orthopedic surgeries (SEMLS) to correct multiple  
32 bone and muscle impairments in a single intervention (McGinley et al. (2012)). Yet walking involves  
33 complex interactions between the musculoskeletal and motor control systems, which are both impaired  
34 in CP. Hence, the treatment outcome does not only depend on the success of the intervention in terms of  
35 musculoskeletal remediation but also on the remaining motor control (Schwartz et al. (2016)). As a result,  
36 over the last decades, only modest, unpredictable, and stagnant treatment outcomes have been documented  
37 for children with CP (Schwartz (2018)). For example, SEMLS have been reported to improve walking  
38 performance in only 25 to 43% of the patients (Filho et al. (2008); Chang et al. (2006)) and to lead to  
39 clinically meaningful improvements over natural progression in only 37% of the cases (Rajagopal et al.  
40 (2018)). Computer models that can predict the functional outcome of treatments on walking performance  
41 have the potential to improve this success rate by allowing clinicians to optimize the clinical decision  
42 making (e.g., by discriminating the effects of musculoskeletal restoration due to surgical interventions to  
43 those from tone reduction and physical therapy targeting motor control impairments). However, predictive  
44 simulations are not yet applied in clinical practice, in part due to computational and modeling challenges.

45 Predictive simulations generate novel movements based on a mathematical model of the neuro-  
46 musculoskeletal system without relying on experimental data. Typically, these simulations consist in  
47 identifying muscle excitations that follow a certain control strategy and drive the musculoskeletal model  
48 to achieve a movement-related goal (e.g., moving forward at a given speed). For such simulations to be  
49 valuable in predicting the functional outcome of treatments on walking performance, they should be based  
50 on models that are complex enough to describe the musculoskeletal structures and motor control processes  
51 underlying walking that may be impaired and thus affected by treatment. Yet these complex models are  
52 computationally expensive in predictive simulations (Anderson and Pandy (2001); Miller (2014); Song  
53 and Geyer (2015); Lin et al. (2018)) and, therefore, their ability to predict the variety of gaits encountered  
54 under different conditions (e.g., healthy and pathological gaits) has been only scarcely explored in the  
55 literature. We recently developed a simulation framework to generate rapid (i.e., about 30 minutes of  
56 computational time) predictive simulations of gait with complex models (Falisse et al. (2019)). Further,  
57 we demonstrated the ability of our framework to predict the mechanics and energetics of a broad range  
58 of gaits, suggesting that our models and simulations were sufficiently generalizable for use in clinical  
59 applications. Nevertheless, the ability of our simulations to identify the main treatment targets in specific  
60 patients remains untested. Specifically, for children with CP, simulations should allow distinguishing the  
61 effects of musculoskeletal versus motor control impairments on walking performance to be able to help  
62 clinicians optimize treatments.

63 Predicting the effects of impairments on walking performance in children with CP requires that the neuro-  
64 musculoskeletal model captures these impairments. In this work, we focus on two types of impairments:  
65 motor control impairments that include spasticity and non-selective muscle control, and musculoskeletal  
66 impairments that include bone deformities and altered muscle-tendon properties.

67 Spasticity has been described as a velocity-dependent increase in tonic stretch reflex responses resulting  
68 from hyper-excitability of the stretch reflex (Lance (1980)). Following such description, models have been  
69 developed to describe the measured response in muscle activity (i.e., electromyography (EMG)) to passive  
70 stretches based on feedback from muscle velocity (van der Krogt et al. (2016)). However, we previously  
71 showed that a model based on feedback from muscle force and force rate better explains the response  
72 of spastic hamstrings and gastrocnemii than length- and velocity-based models (Falisse et al. (2018)).  
73 Further, we found that a force-based model could predict muscle activity in agreement with pathological  
74 EMG during gait. While spasticity manifests during passive stretches, its influence during gait remains  
75 unclear (Dietz and Sinkjaer (2007)). Incorporating spasticity models in predictive simulations would allow  
76 evaluating the impact of spasticity on gait performance, providing insights into the role of spasticity during  
77 gait. Further, modeling spasticity is a prerequisite for simulating the effects of treatments aiming to reduce  
78 spasticity, such as botulinum toxin type A (BTX-A) injections.

79 The inability to selectively control muscles has been described through muscle synergies (Ivanenko  
80 et al. (2004)), which are independent groups of muscles activated in a fixed ratio by a single input signal.  
81 Children with CP have been shown to use fewer synergies (i.e., a simpler neuromuscular control strategy)  
82 than typically developing (TD) individuals during walking (Steele et al. (2015)) as well as to use synergies  
83 exhibiting a greater stride-to-stride variability (Kim et al. (2018)). However, assessing the relationship  
84 between simpler neuromuscular control and impaired gait is difficult. For example, Shuman et al. (2019)  
85 showed that treatments such as BTX-A injections, selective dorsal rhizotomy, and SEMLS minimally  
86 affected synergies despite changing the walking patterns. Predictive simulations have the potential to relate  
87 synergy complexity to impaired walking abilities, which might help designing specific treatments (e.g.,  
88 physical therapy protocols) targeting impaired selective motor control.

89 Bone deformities and resultant altered muscle path trajectories make the use of generic musculoskeletal  
90 models linearly-scaled to the subjects' anthropometry inappropriate for clinical analyses in children with  
91 CP. A well established approach to capture these aberrant geometries is through the use of models created  
92 from Magnetic Resonance Imaging (MRI) (Arnold et al. (2001); Scheys et al. (2009, 2011a)). Such  
93 models have been shown to improve, for example, the accuracy of moment arm estimation in children  
94 with CP (Scheys et al. (2011b)). Besides geometries, the muscle-tendon properties are also altered in  
95 these children (e.g., smaller muscle volumes and shorter fiber lengths as compared to TD individuals)  
96 (Barrett and Lichtwark (2010); Smith et al. (2011); Barber et al. (2011a,b, 2012)). This makes the use of  
97 Hill-type muscle-tendon models with generic (i.e., anthropometry-based) parameters unsuited for clinical  
98 studies. Indeed, such parameters may not reflect altered muscle force generating capacities and, therefore,  
99 result in unrepresentative simulations. To capture the impact of altered muscle-tendon properties on  
100 walking performance, the muscle-tendon parameters should be personalized. Different approaches have  
101 been proposed for such purpose, including methods based on angle-torque relationships from functional  
102 movements (Lloyd and Besier (2003); Falisse et al. (2017)).

103 Predictive simulations have the potential to shed light upon the influence of altered musculoskeletal  
104 properties, impaired selective motor control, and spasticity on walking performance by evaluating the  
105 isolated effects of these impairments. Yet only few predictive analyses have used simulations for such  
106 purpose. Recent modeling work showed that a musculoskeletal model could reproduce an unimpaired

107 walking pattern with five synergies but not with two synergies similar to those seen after neurological injury,  
108 suggesting that impaired control affects walking performance (Meharbi et al. (2019)). Another predictive  
109 analysis explored the effects of aging on walking performance by adjusting skeletal and neuromuscular  
110 parameters and reported a predominant contribution of loss in muscle strength and mass to reduced  
111 energy efficiency (Song and Geyer (2018)). Both studies, however, relied on simple two-dimensional (2D)  
112 models, neglecting motor control mechanisms in the frontal plane. To the authors' knowledge, no study  
113 has yet attempted to relate patients' clinical examination reports to the outcome of predictive simulations  
114 evaluating the effects of musculoskeletal and motor control impairments on walking performance based on  
115 three-dimensional (3D) subject-specific models.

116 The purpose of this study was to evaluate the ability of our predictive simulation platform to differentiate  
117 the effects of musculoskeletal and motor control impairments on the impaired walking pattern (i.e.,  
118 crouch gait) of a specific child with CP. To this aim, we evaluated the effect of these impairments on  
119 gait patterns predicted by performance optimization (Figure 1A). We first investigated the influence of  
120 using personalized rather than generic muscle-tendon parameters, thereby assessing the contribution of  
121 the child's altered muscle-tendon properties to the crouch gait pattern. We then evaluated the impact of  
122 imposing a number of synergies lower than typically reported for unimpaired individuals, thereby testing  
123 how reducing neuromuscular control complexity affects walking performance. We finally investigated  
124 the effect of spasticity modeled based on muscle force and force rate feedback. In all cases, we used a  
125 MRI-based musculoskeletal model of the child to take his aberrant geometries into account. We found  
126 that the altered muscle-tendon properties rather than the control impairments alone caused a crouch gait  
127 pattern. As an additional analysis, we investigated whether the child's impairments impede a walking  
128 pattern similar to TD walking or rather make such a walking pattern less optimal. To this aim, we extended  
129 the performance criterion of the predictive simulations with a tracking term that penalized deviations from  
130 a TD walking pattern. We found that the musculoskeletal impairments did not prevent an upright walking  
131 pattern resembling TD walking but that upright walking was less optimal than walking in crouch.

## 2 MATERIAL AND METHODS

132 The overall process to evaluate the effects of impairments on walking performance through predictive  
133 simulations is outlined in Figure 1B. The following sections provide details of this process.

### 134 Experimental data

135 We collected data from one child with diplegic CP (male; age: 15 years; height: 143 cm; mass: 33.1  
136 kg). The data collection was approved by the Ethics Committee at UZ Leuven (Belgium) and written  
137 informed consent was obtained from the child's parents. The child was instrumented with retro-reflective  
138 skin mounted markers whose 3D trajectories were recorded (100 Hz) using a motion capture system (Vicon,  
139 Oxford, UK) during overground walking at self-selected speed. Ground reaction forces were recorded  
140 (1000 Hz) using force plates (AMTI, Watertown, USA). EMG was recorded (2000 Hz) using a telemetric  
141 Zerowire system (Cometa, Milan, Italy) from eight muscles of each leg (rectus femoris, biceps femoris  
142 short head, semitendinosus, tibialis anterior, gastrocnemius lateralis, vastus lateralis, soleus, and gluteus  
143 medius). EMG from the rectus femoris and vastus lateralis was of poor quality and excluded from the  
144 analysis.

145 On the same day as the gait analysis, spasticity of the right medial hamstrings and gastrocnemii was  
146 assessed using an instrumented passive spasticity assessment (IPSA; described in detail by Bar-On et al.  
147 (2013)). Hamstrings and gastrocnemii were passively stretched by moving knee and ankle, respectively,



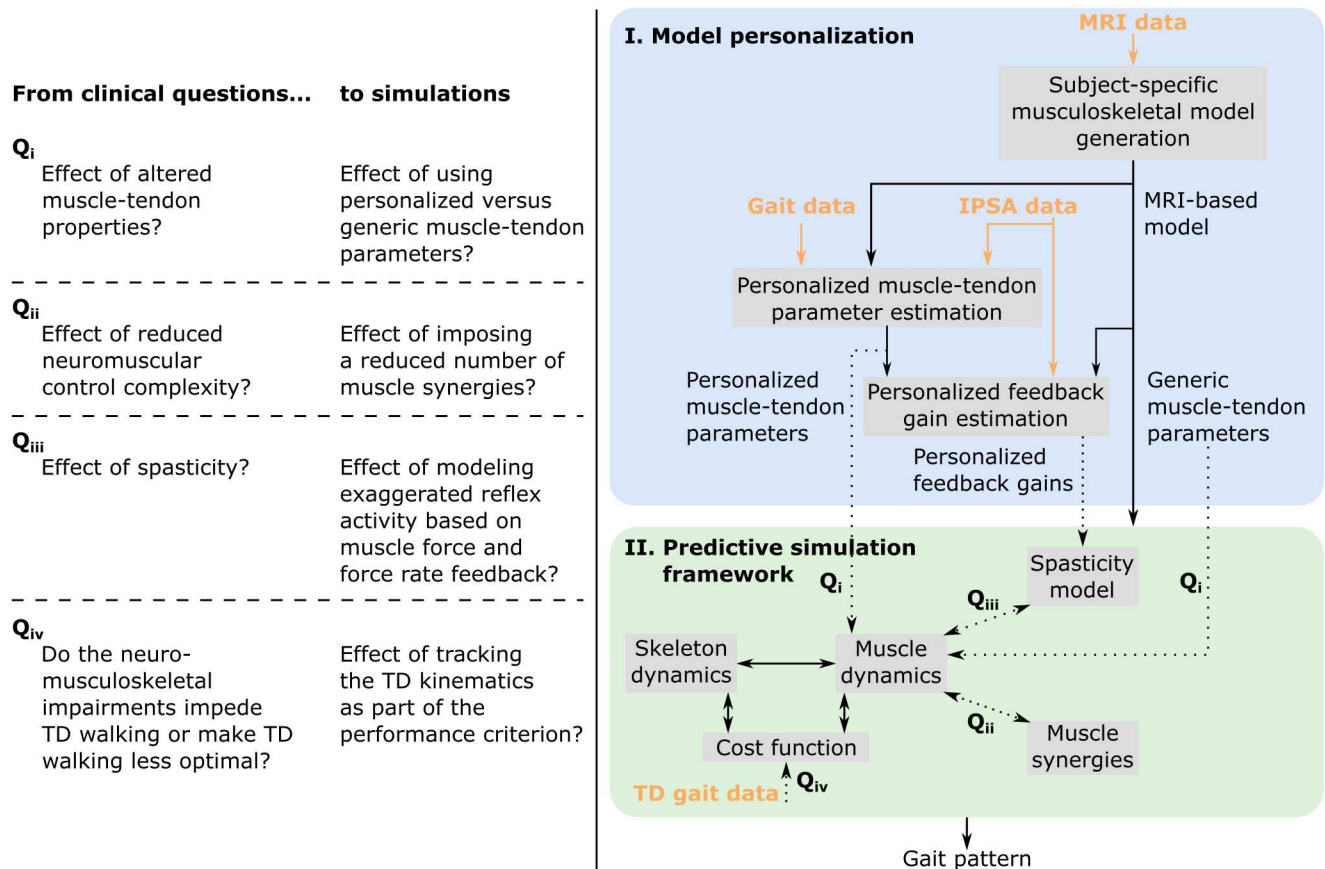

**Figure 1. Overview of (A) clinical questions and corresponding simulations, and (B) methodology.** MRI images are used to generate a musculoskeletal model of the child with subject-specific geometries. This MRI-based model as well as experimental data collected during walking and instrumented passive spasticity assessments (IPSA) are inputs to optimization procedures providing personalized estimates of Hill-type muscle-tendon parameters characterizing altered muscle-tendon properties and personalized feedback gains characterizing spasticity. The framework for predictive simulations generates gait patterns by optimizing a cost function, describing a walking-related performance criterion, subject to the muscle and skeleton dynamics of the MRI-based musculoskeletal model. We investigated the effects of impairments on predicted gait patterns (dotted arrows):  $Q_i$  we evaluated the effect of altered versus unaltered muscle-tendon properties by using personalized versus generic muscle-tendon parameters in the muscle dynamics;  $Q_{ii}$  we assessed the influence of reducing the neuromuscular control complexity by imposing a reduced number of muscle synergies;  $Q_{iii}$  we explored the impact of spasticity on walking performance. Details on how we modeled these impairments are described in the methods. As an additional analysis,  $Q_{iv}$ , we evaluated how well the model was able to reproduce the gait pattern of a typically developing (TD) child by adding a term in the cost function penalizing deviations between predicted gait pattern and measured gait data of a TD child. All these analyses can be combined as well as performed in isolation. Details are provided in section “model-based analyses”.

148 one at a time from a predefined position throughout the full range of motion (ROM). The stretches  
 149 were performed at slow and fast velocities. EMG was collected from four muscles (semitendinosus,  
 150 gastrocnemius lateralis, rectus femoris, and tibialis anterior) using the same system and electrode placement  
 151 as used for gait analysis. The motion of the distal and proximal segments were tracked using two inertial  
 152 measurement units (Analog Devices, ADIS16354). The forces applied to the segment were measured using  
 153 a hand-held six degrees of freedom (DOFs) load-cell (ATI Industrial Motion, mini45). The position of the  
 154 load-cell relative to the joint axis was manually measured by the examiner.



170 consisted of 21 DOFs (six between the pelvis and the ground; three at each hip joint; one at each knee,  
171 ankle, and subtalar joint; and three at the lumbar joint), 86 muscles actuating the lower limbs (43 per leg),  
172 three ideal torque actuators at the lumbar joint, and four contact spheres per foot (Delp et al. (1990, 2007)).  
173 We added passive torques to the joints of the lower limbs and the trunk to model the role of the ligaments  
174 and other passive structures (Anderson and Pandy (2001)). These passive torques varied exponentially with  
175 joint positions and linearly with joint velocities.

176 We used Raasch's model (Raasch et al. (1997); De Groote et al. (2009)) to describe muscle excitation-  
177 activation coupling (muscle activation dynamics) and a Hill-type muscle-tendon model (Zajac (1989);  
178 De Groote et al. (2016)) to describe muscle-tendon interaction and the dependence of muscle force on  
179 fiber length and velocity (muscle contraction dynamics). We modeled skeletal motion with Newtonian  
180 rigid body dynamics and smooth approximations of compliant Hunt-Crossley foot-ground contacts (Delp  
181 et al. (2007); Sherman et al. (2011); Falisse et al. (2019)). We calibrated the Hunt-Crossley contact  
182 parameters (transverse plane locations and contact sphere radii) through muscle-driven tracking simulations  
183 of the child's experimental walking data as described in previous work (Falisse et al. (2019)). To increase  
184 computational speed, we defined muscle-tendon lengths, velocities, and moment arms as a polynomial  
185 function of joint positions and velocities (van den Bogert et al. (2013); Falisse et al. (2019)).

## 186 Personalized muscle-tendon parameter estimation

187 The force-length-velocity relationships describing the force generating capacity of the Hill-type muscle-  
188 tendon model are dimensionless and can be scaled to a specific muscle through five muscle-tendon  
189 parameters: the maximal isometric force  $F_m^{\max}$ , the optimal fiber length  $l_m^{\text{opt}}$ , the tendon slack length  $l_t^s$ ,  
190 the optimal pennation angle  $\alpha_m^{\text{opt}}$ , and the maximal fiber contraction velocity  $v_m^{\max}$  (assigned to ten times  
191  $l_m^{\text{opt}}$ ). In this study, we used generic and personalized parameters when generating predictive simulations of  
192 walking (Figure 1).

193 The generic parameters were derived by linearly scaling the parameters of a generic musculoskeletal  
194 model (Delp et al. (1990)) to the child's anthropometry. The linear scaling was only performed for the  
195 optimal fiber lengths and tendon slack lengths. The maximal isometric muscle forces were scaled based on  
196 body mass  $M$  (van der Krogt et al. (2016)):

$$F_{m,\text{subject}}^{\max} = F_{m,\text{gait2392}}^{\max} \left( \frac{M_{\text{subject}}}{M_{\text{gait2392}}} \right)^{(2/3)}, \quad (1)$$

197 where gait2392 refers to the OpenSim gait2392 model (Delp et al. (1990, 2007)).

198 The personalized parameters reflect the muscle force generating capacity of the subject. Only optimal  
199 fiber lengths and tendon slack lengths were personalized as gait simulations have been shown to be the  
200 most sensitive to these two parameters (De Groote et al. (2010)). The personalization process was based on  
201 an extension of an optimal control approach to solve the muscle redundancy problem while accounting  
202 for muscle dynamics (De Groote et al. (2016); Falisse et al. (2017)). Solving the muscle redundancy  
203 problem identifies muscle excitations that reproduce joint torques underlying a given movement while  
204 minimizing a performance criterion (e.g., muscle effort). We augmented this formulation in different ways.  
205 First, we added optimal fiber lengths and tendon slack lengths as optimization variables. Second, we  
206 introduced a term in the cost function minimizing the difference between muscle activations and scaled  
207 EMG signals where scale factors were included as optimization variables. Third, we assumed that muscles  
208 operate around their optimal fiber lengths, and that maximal and minimal fiber lengths across movements

209 should hence be larger and smaller, respectively, than their optimal fiber lengths. Fourth, we assumed  
 210 that resistance encountered when evaluating the ROM during the clinical examination may be, at least  
 211 in part, attributed to passive muscle forces. Hence, we included a term in the cost function minimizing  
 212 the difference between fiber lengths at these extreme positions of the ROM and reference fiber lengths  
 213 generating large passive forces. Finally, we minimized optimal fiber lengths, assuming that children with  
 214 CP have short fibers (Barrett and Lichtwark (2010)). The problem thus consisted in identifying muscle  
 215 excitations and parameters that minimized a multi-objective cost function:

$$J_{\text{estimation}} = \int_{t_0}^{t_f} \left( \underbrace{w_1 \|a\|_2^2}_{\text{Muscle effort}} + \underbrace{w_2 \|a - EMG\|_2^2}_{\text{EMG deviation}} + \underbrace{w_3 \|l_m^{\max} - l_{\text{ref}}^{\max}\|_2^2}_{\text{Passive forces in extreme positions}} + \underbrace{w_4 \|l_m^{\text{opt}}\|_1}_{\text{Short fibers}} + \underbrace{w_5 \|a_r\|_2^2}_{\text{Reserve actuators}} \right) dt, \quad (2)$$

216 where  $t_0$  and  $t_f$  are initial and final times,  $a$  are muscle activations,  $l_m^{\max}$  and  $l_{\text{ref}}^{\max} = 1.5$  are simulated  
 217 and reference fiber lengths, respectively, at the extreme positions of the ROM,  $a_r$  are reserve actuators,  
 218  $w_{1-5}$  are weight factors, and  $t$  is time. This cost function was subject to constraints enforcing muscle  
 219 dynamics, that resultant muscle forces should reproduce joint torques calculated from inverse dynamics,  
 220 that fiber lengths should cross their optimal fiber lengths during the movement, and that the difference  
 221 between activations and EMG should not be larger than 0.1. Reserve actuators are non-physiological ideal  
 222 actuators added to muscle-generated torques to ensure that joint torques from inverse dynamics can be  
 223 reproduced. The weights were manually adjusted to the following:  $w_1 = 10 \times 10^{-4}$ ,  $w_2 = 30 \times 10^{-4}$ ,  
 224  $w_3 = 3550 \times 10^{-4}$ ,  $w_4 = 1010 \times 10^{-4}$ , and  $w_5 = 5400 \times 10^{-4}$ . These weights primarily penalized the  
 225 use of reserve actuators and encouraged the generation of passive forces in the extreme positions of the  
 226 ROM. We solved this problem while simultaneously considering data from four gait trials of each leg and  
 227 six passive stretches (IPSA measurements) of the right hamstrings, rectus femoris, and gastrocnemii at  
 228 slow and fast velocities (one stretch per muscle per speed). Data from 14 trials (gait and passive trials  
 229 combined) was thus included. Data from passive stretches of left leg muscles was not available. Hence, we  
 230 imposed that corresponding parameters of both legs could not differ by more than 5%. The parameters  
 231 were allowed to vary between 50 and 200% of the generic values.

## 232 Spasticity model - Personalized feedback gain estimation

233 We modeled spasticity through delayed feedback from muscle-tendon force and its first time derivative  
 234 (i.e., force rate) (Falisse et al. (2018)). The model relates sensory information  $s$  (i.e., muscle force and  
 235 force rate) to feedback muscle activations  $a_s$  through a first order differential equation:

$$\tau \frac{da_s}{dt} = \begin{cases} -a_s, & s \leq T_s \\ -a_s + g_s(s - T_s), & s > T_s \end{cases} \quad (3)$$

236 where  $T_s$  is a feedback threshold,  $g_s$  is a feedback gain, and  $\tau_s = 30$  ms is a time delay.

237 We determined the threshold for force feedback as the value 20 ms before the EMG onset (Staudé  
 238 and Wolf (1999)) and used a zero threshold for force rate feedback. We identified the personalized  
 239 feedback gains that minimized the difference between EMG and feedback muscle activations during fast  
 240 passive stretches (IPSA measurements). We performed such optimization for the right medial hamstrings  
 241 (i.e., biceps femoris long head, semitendinosus, and semimembranosus) and for the right gastrocnemii  
 242 (i.e., gastrocnemius lateralis and medialis). We used semitendinosus EMG to drive the three hamstrings



243 and gastrocnemius lateralis EMG to drive both gastrocnemii. We normalized EMG using scale factors  
244 identified when estimating the personalized muscle-tendon parameters. We described the optimization  
245 process in detail in previous work (Falisse et al. (2018)). We incorporated the spasticity model with  
246 personalized feedback gains in our framework for predictive simulations (Figure 1). Since we only had  
247 IPSA measurement for the right leg, we used feedback gains and thresholds identified with right leg data  
248 for left leg muscles. Gait EMG data and spasticity, as clinically assessed (Table 1), were comparable for  
249 both legs.

## 250 Muscle synergies

251 We modeled the reduced neuromuscular control complexity through muscle synergies. These synergies  
252 consisted of two matrices: a  $N_{\text{syn}} \times N_f$  matrix  $H$ , where  $N_{\text{syn}}$  is the number of synergies and  $N_f$  is the  
253 number of frames, containing synergy activations and a  $N_m \times N_{\text{syn}}$  matrix  $W$ , where  $N_m$  is the number of  
254 muscles, containing weights that determine the contribution of each muscle in each synergy. Individual  
255 muscle activations were composed from synergies as follows:

$$a = W \times H, \quad (4)$$

256 where  $a$  has dimensions  $N_m \times N_f$ . Importantly, we did not impose subject-specific synergies when  
257 generating predictive simulations (Figure 1). Instead, we modeled the effect of reducing the neuromuscular  
258 control complexity by limiting the number of synergies per leg to four or three, thereby limiting the  
259 selection of independent muscle activations. This represents a reduction of the neuromuscular control  
260 complexity under the assumption that five synergies describe healthy human locomotion (Ivanenko et al.  
261 (2004)).

## 262 Problem formulation

263 We predicted gait patterns by optimizing a gait-related cost function, independent of experimental data,  
264 based on the MRI-based musculoskeletal model described above. In addition to optimizing performance,  
265 we imposed average gait speed and periodicity of the gait pattern. We optimized for a full gait cycle to  
266 account for asymmetry of CP gait. We solved the resultant optimal control problem via direct collocation.  
267 The problem formulation and computational choices are detailed in previous work (Falisse et al. (2019)).

268 The cost function represents the goal of the motor task. We modeled this task-level goal as a weighted  
269 sum of gait-related performance criteria including metabolic energy rate, muscle fatigue, joint accelerations,  
270 passive joint torques, and trunk actuator excitations:

$$J_{\text{prediction}} = \int_0^{t_f} \frac{1}{d} \left( \underbrace{w_1 \|\dot{E}\|_2^2}_{\text{Metabolic energy rates}} + \underbrace{w_2 \|a\|_{10}^{10}}_{\text{Muscle fatigue}} + \underbrace{w_3 \|\ddot{q}\|_2^2}_{\text{Joint accelerations}} + \underbrace{w_4 \|T_p\|_2^2}_{\text{Passive joint torques}} + \underbrace{w_5 \|e_t\|_2^2}_{\text{Trunk actuator excitations}} \right) dt, \quad (5)$$

271 where  $t_f$  is unknown gait cycle duration,  $d$  is distance travelled by the pelvis in the forward direction,  $\dot{E}$  are  
272 metabolic energy rates,  $a$  are muscle activations,  $\ddot{q}$  are joint accelerations,  $T_p$  are passive joint torques,  $e_t$   
273 are excitations of the trunk torque actuators,  $w_{1-5}$  are weight factors, and  $t$  is time. We modeled metabolic  
274 energy rate using a smooth approximation of the phenomenological model described by Bhargava et al.  
275 (2004). This metabolic model requires parameters for fiber type composition and muscle specific tension,  
276 which we obtained from the literature (Uchida et al. (2016)). We manually adjusted the weight factors

277 until we found a set of weights that predicted human-like walking:  $w_1 = (25/86/\text{body mass}) \times 10^{-2}$ ,  
278  $w_2 = 25/86 \times 10^2$ ,  $w_3 = 50/21$ ,  $w_4 = 10/15 \times 10^2$ , and  $w_5 = 1/3 \times 10^{-1}$ . We added several path  
279 constraints enforcing a prescribed average gait speed corresponding to the child's average gait speed  
280 ( $d/t_f = 1 \text{ m s}^{-1}$ ), imposing periodic states over the complete gait cycle (except for the pelvis forward  
281 position), and preventing inter-penetration of body segments.

## 282 Model-based analyses

283 We investigated the differential effects of altered muscle-tendon properties, reduced neuromuscular  
284 control complexity, and spasticity on gait patterns predicted with the MRI-based musculoskeletal model  
285 (Figure 1). In particular, we compared predicted joint kinematics and kinetics, muscle activity, and stride  
286 lengths to their experimental counterparts. We also evaluated how impairments affected the metabolic cost  
287 of transport (COT), defined as metabolic energy consumed per unit distance traveled.

288 First, we tested the influence of altered versus unaltered muscle-tendon properties by using personalized  
289 versus generic muscle-tendon parameters in the muscle dynamics ( $Q_i$  in Figure 1). In this initial analysis,  
290 we did not include spasticity, nor imposed synergies.

291 Second, we assessed the impact of reducing the neuromuscular control complexity by imposing fixed  
292 numbers of synergies ( $Q_{ii}$  in Figure 1). To assess the effect of reducing the number of synergies, we  
293 compared the synergy activations resulting from simulations with three and four synergies using the  
294 coefficient of determination  $R^2$  and the synergy weights using Pearson's coefficient of correlation  $r$ . We  
295 generated simulations with both sets of muscle-tendon parameters to explore the effect of synergies in  
296 isolation as well as in combination with altered muscle-tendon properties.

297 Finally, we evaluated the effect of spasticity in the three medial hamstrings and two gastrocnemii of both  
298 legs ( $Q_{iii}$  in Figure 1). We modeled muscle activations as the sum of reflex muscle activations determined  
299 based on the personalized spasticity model and feedforward muscle activations:

$$a_{\text{sum}} = a_{f_f} + a_{F_t} + a_{dF_t}, \quad (6)$$

300 where  $a_{f_f}$  are feedforward muscle activations, and  $a_{F_t}$  and  $a_{dF_t}$  are muscle activations from muscle force  
301 and force rate feedback, respectively. We only tested the effect of spasticity based on the model with  
302 personalized muscle-tendon parameters, since these parameters were used to estimate the feedback gains.  
303 We tested the effect of spasticity in combination with selective control (i.e., no synergy constraints) as well  
304 as with a reduced number of muscle synergies.

306 As an additional analysis, we investigated whether the child adopted an impaired crouch gait pattern  
307 because of neuro-mechanical constraints or because it was more optimal ( $Q_{iv}$  in Figure 1). To this aim, we  
308 added a term in the cost function that penalized deviations from measured kinematics of a TD child:

$$J_{\text{tracking}} = \int_0^{t_f} \left( \underbrace{w_6 \|q - \hat{q}\|_2^2}_{\text{TD kinematics deviation}} \right) dt, \quad (7)$$

309 where  $\hat{q}$  are measured joint positions of a TD child and  $w_6 = 100/20$  is a weight factor. We generated  
310 these simulations with personalized parameters as well as with and without synergies. We did not include

311 spasticity in this analysis since it had little influence on the walking pattern in the simulations described  
312 above.

313 We formulated our problems in MATLAB using CasADi (Andersson et al. (2019)), applied direct  
314 collocation using a third order Radau quadrature collocation scheme with 150 mesh intervals per gait cycle,  
315 and solved the resulting nonlinear programming problems with the solver IPOPT (Wächter and Biegler  
316 (2006)). We applied algorithmic differentiation to compute derivatives (Falisse et al. (2019)). We started  
317 each optimization from multiple initial guesses and selected the result with the lowest optimal cost. Initial  
318 guesses for joint variables were based on experimental data. Specifically, for all simulations, we used  
319 two initial guesses derived from experimental kinematics of the CP and the TD child. For simulations  
320 accounting for synergies, we added initial guesses derived from simulated kinematics with the lowest  
321 optimal costs produced without synergies and with more synergies (e.g., with three synergies, initial  
322 guesses were derived from the best kinematic solutions with four synergies and without synergies). For  
323 simulations accounting for spasticity, we added initial guesses derived from simulated kinematics with  
324 the lowest optimal costs produced without spasticity. In all cases, initial guesses for muscle, trunk, and  
325 synergy variables were constant across time and not informed by experimental data. Initial guesses for  
326 synergy weights were constant across muscles and independent of experimental data.

## RESULTS

### 327 Gait analysis

328 The child walked with a pronounced crouch gait pattern characterized by bilateral knee extension deficits  
329 with reduced knee ROM during swing, a lack of right ankle dorsiflexion at the end of swing, excessive left  
330 ankle dorsiflexion, excessive and deficient right and left hip adduction, respectively, and excessive bilateral  
331 hip internal rotation (Figures 2 and S1).

### 332 Influence of the muscle-tendon parameters

333 Using personalized versus generic muscle-tendon parameters resulted in a crouch (i.e., excessive knee  
334 flexion) versus a more upright gait pattern (Figures 2 and S1; Movies S1-2). Personalized optimal fiber  
335 lengths and tendon slack lengths were generally smaller and larger, respectively, than their generic  
336 counterparts (Tables S1-2). The use of personalized parameters resulted in decreased deviations (smaller  
337 root mean square error (RMSE)) between measured and predicted knee angles (RMSE of 17° and 11°  
338 for the left and right leg, respectively) as compared to the use of generic parameters (RMSE of 43° and  
339 25°). The gastrocnemius lateralis and soleus (ankle plantarflexors) were activated earlier in stance with  
340 the crouch gait, as observed in the child's EMG. The vasti (knee extensors) activity was also increased  
341 during stance when the model walked in crouch. The COT was higher with the personalized parameters  
342 (crouch gait; 3.45 J kg<sup>-1</sup>m<sup>-1</sup>) than with the generic parameters (more upright gait; 3.18 J kg<sup>-1</sup>m<sup>-1</sup>).  
343 Predicted stride lengths were larger than the average stride length of the child but were within two standard  
344 deviations.

### 345 Influence of the synergies with generic muscle-tendon parameters

346 Reducing the number of synergies in combination with generic muscle-tendon parameters did not induce  
347 the amount of crouch that was experimentally measured in the child, although it altered muscle coordination  
348 and increased COT (Figures 3 and S2; Movie S3). The right knee flexion angles increased during stance  
349 with the reduction of the neuromuscular control complexity but were still smaller than experimentally

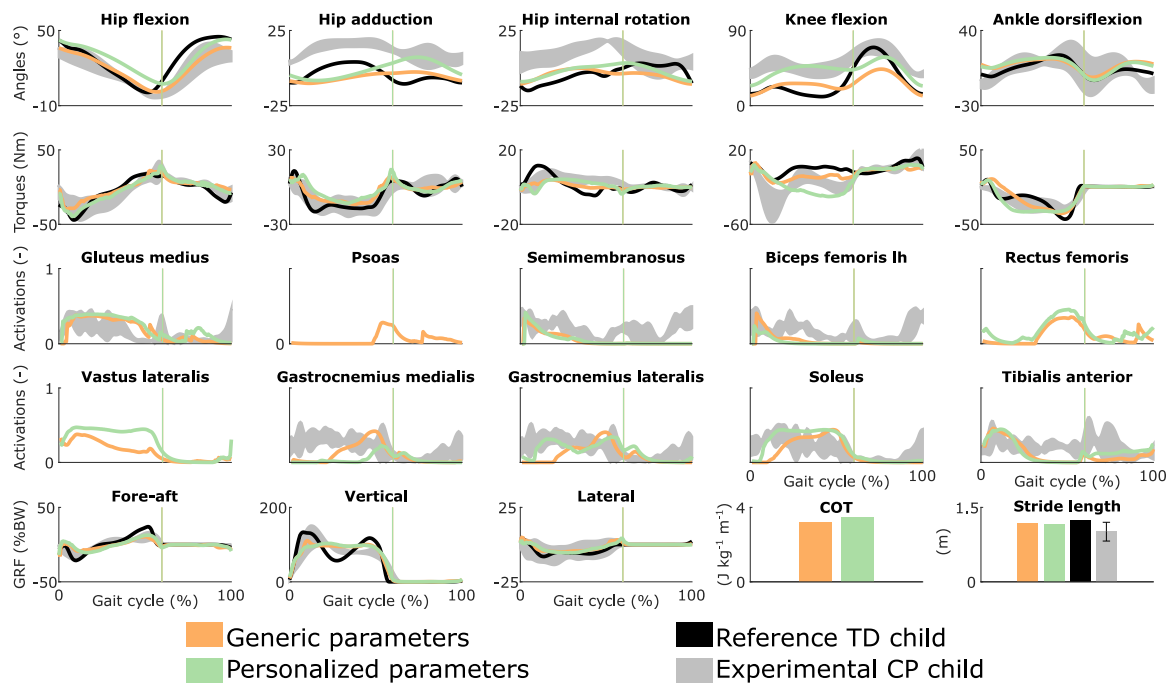

**Figure 2. Influence of the muscle-tendon parameters on the predicted walking gaits.** Variables from the right leg are shown over a complete gait cycle; left leg variables are shown in Figure S1 (Supplementary Material). Vertical lines indicate the transition from stance to swing. Experimental data is shown as mean  $\pm$  two standard deviations. Experimental EMG data was normalized to peak activations. GRF is for ground reaction forces; BW is for body weight; COT is for metabolic cost of transport; lh is for long head.

350 measured. This was accompanied with increased rectus femoris (knee extensor) activity. The synergies had  
 351 a limited effect on the left leg that had a straight knee pattern during stance. The COT increased with the  
 352 reduction of the neuromuscular control complexity (3.58 and 3.90 J kg<sup>-1</sup>m<sup>-1</sup> with four and three synergies,  
 353 respectively). The synergies had little effect on the predicted stride lengths that were larger than the child's  
 354 average stride length but were within two standard deviations. The synergies of the three-synergy case were  
 355 similar to the first three synergies of the four-synergy case (average R<sup>2</sup> and *r* over three common synergy  
 356 activations and weight vectors, respectively, of both legs: 0.84  $\pm$  0.19 and 0.83  $\pm$  0.10). The additional  
 357 synergy in the four-synergy case was activated in early stance and at the transition between stance and  
 358 swing, and mainly consisted of hip adductors.

### 359 Influence of the synergies with personalized muscle-tendon parameters

360 Reducing the number of synergies in combination with personalized muscle-tendon parameters had a  
 361 minor effect on gait kinematics but altered muscle coordination and increased COT (Figures 4 and S3;  
 362 Movie S4). Specifically, synergies only had a slight effect on the kinematics during the swing phase of the  
 363 right leg but affected the activation pattern of certain muscles (e.g., gastrocnemius medialis and lateralis).  
 364 The COT increased with the reduction of the neuromuscular control complexity (3.94 and 4.09 J kg<sup>-1</sup>m<sup>-1</sup>  
 365 with four and three synergies, respectively). Stride lengths slightly decreased with synergies but remained  
 366 larger than the child's average stride length. The synergies of the three-synergy case were similar to the  
 367 first three synergies of the four-synergy case (average R<sup>2</sup> and *r*: 0.85  $\pm$  0.05 and 0.87  $\pm$  0.09, respectively).  
 368 The additional synergy in the four-synergy case was activated in early stance and at the transition between  
 369 stance and swing, and mainly consisted of the gemellus, piriformis, tibialis posterior, and several ankle  
 370 plantarflexors.



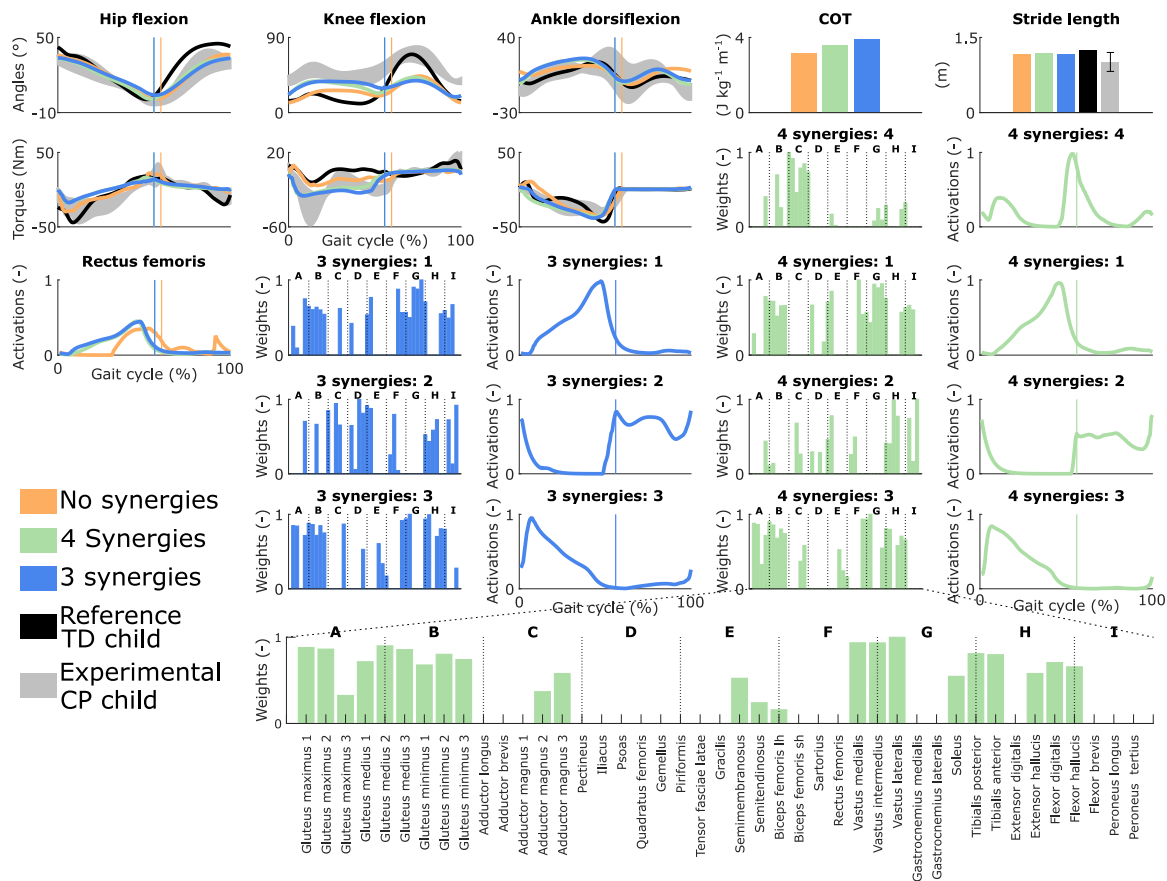

**Figure 3. Influence of the synergies on walking gaits predicted with the generic muscle-tendon parameters.** Variables from the right leg are shown over a complete gait cycle; left leg variables are shown in Figure S2 (Supplementary Material). Vertical lines (solid) indicate the transition from stance to swing. Panels of synergy weights are divided into sections (A-I) to relate bars to muscle names provided in the bottom bar plot, which is an expanded version of the plot of weights with title 4 synergies: 3. Lh and sh are for long and short head, respectively. Weights were normalized to one. Experimental data is shown as mean  $\pm$  two standard deviations.

### 371 Influence of spasticity

372 Spasticity had a limited effect on muscle coordination and almost no influence on gait kinematics (Figures  
 373 5 and S4; Movie S5). Specifically, spastic activity was predicted in the medial hamstrings in early stance  
 374 but this had, overall, a minor effect on the total (i.e., combined spastic and non-spastic contributions)  
 375 medial hamstrings activity when compared to simulations without spasticity. Bursts of spastic activity  
 376 were also observed in early swing. Medial hamstrings activity contributes to knee flexion but since similar  
 377 (timing and magnitude) activity profiles were predicted with and without spasticity, there was no difference  
 378 in predicted knee flexion angles. A constant low spastic contribution was predicted for the gastrocnemius  
 379 lateralis during stance, whereas a minor contribution was predicted for the gastrocnemius medialis during  
 380 stance and at the transition between stance and swing. Spasticity hence does not explain the lack of right  
 381 ankle dorsiflexion (i.e., increased plantarflexion) observed at the end of swing in experimental data. Similar  
 382 observations hold with and without synergies. The COT increased when incorporating spasticity (3.75 and  
 383 4.18 J kg<sup>-1</sup>m<sup>-1</sup> with zero and four synergies, respectively).

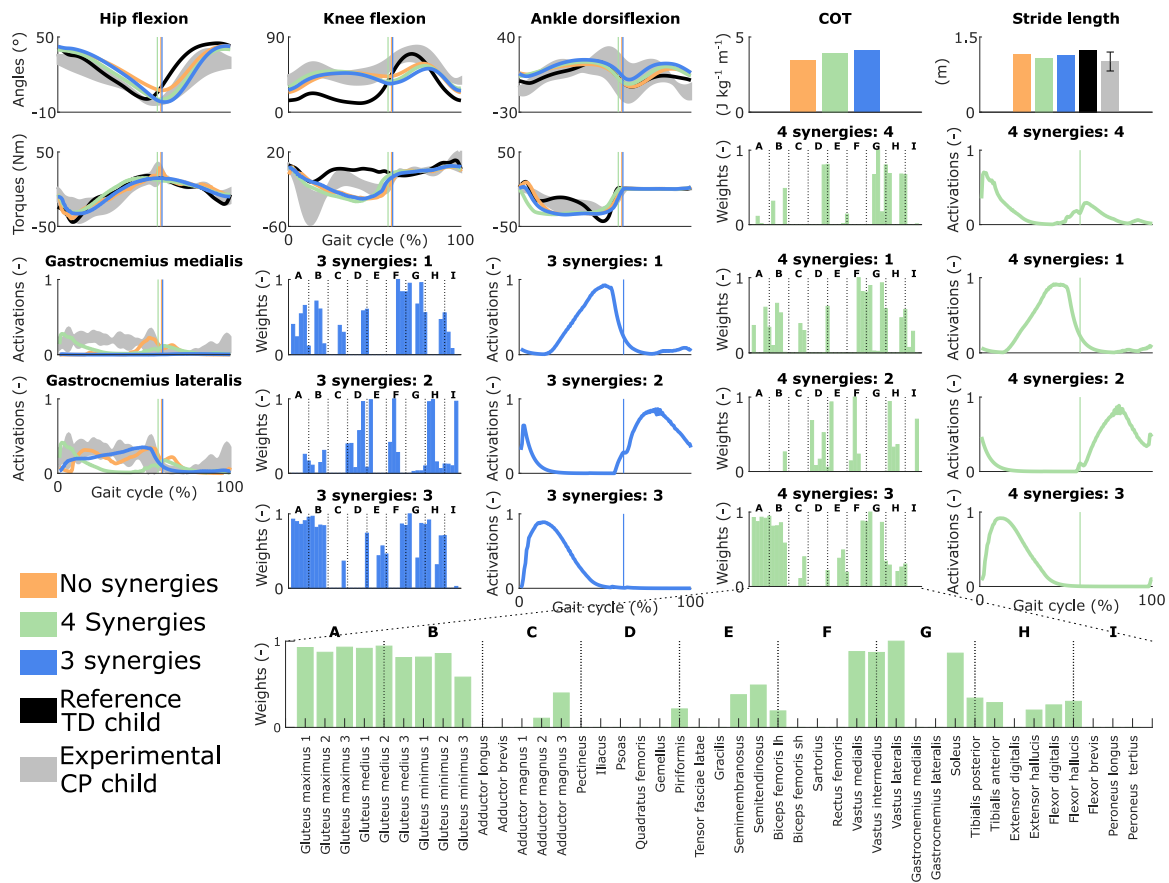

**Figure 4. Influence of the synergies on walking gaits predicted with the personalized muscle-tendon parameters.** Variables from the right leg are shown over a complete gait cycle; left leg variables are shown in Figure S3 (Supplementary Material). Vertical lines (solid) indicate the transition from stance to swing. Panels of synergy weights are divided into sections (A-I) to relate bars to muscle names provided in the bottom bar plot, which is an expanded version of the plot of weights with title 4 synergies: 3. Lh and sh are for long and short head, respectively. Weights were normalized to one. Experimental data is shown as mean  $\pm$  two standard deviations. Experimental EMG data was normalized to peak activations.

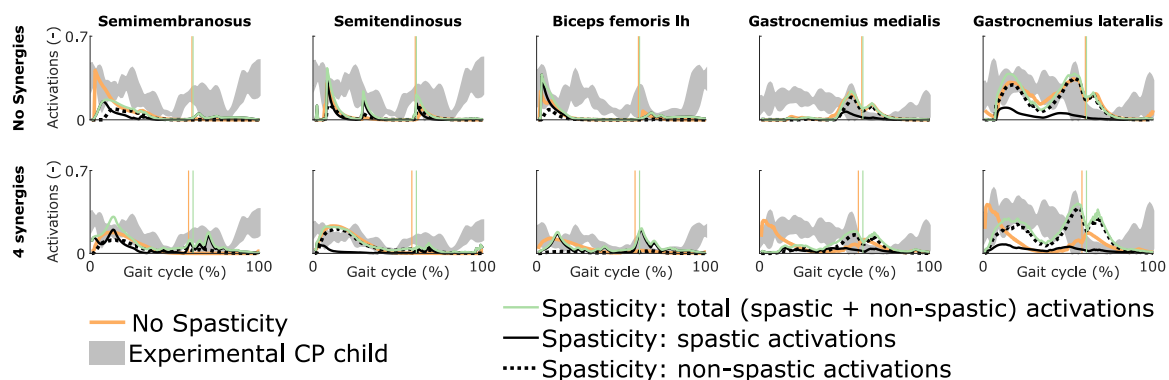

**Figure 5. Influence of spasticity on the predicted muscle activity.** Activations from right leg muscles only are shown over a complete gait cycle; left leg activations are shown in Figure S4 (Supplementary Material). When accounting for spasticity, total activations (green) combine spastic (solid black) and non-spastic (dotted black) activations. Vertical lines indicate the transition from stance to swing. Experimental data is shown as mean  $\pm$  two standard deviations. Experimental EMG data was normalized to peak activations. Lh is for long head.

### 384 Influence of tracking the kinematics of a TD child

385 Tracking the TD kinematics while using personalized muscle-tendon parameters produced an upright gait  
386 pattern when not incorporating synergies, but decreased the overall gait performance (Figures 6 and S5;  
387 Movie S6). Specifically, the simulated gait had a similar COT ( $3.46 \text{ J kg}^{-1} \text{ m}^{-1}$ ) as the crouch gait pattern  
388 predicted without such tracking term but the contribution of most terms in the cost function increased,  
389 suggesting that walking upright is not prevented by mechanical constraints (i.e., aberrant musculoskeletal  
390 geometries and altered muscle-tendon properties) but is less optimal, due to these mechanical constraints,  
391 than walking in crouch for this child. The contribution of the muscle fatigue term increased by 29%, in  
392 part driven by higher activations of the glutei. The contribution of the joint acceleration, metabolic energy  
393 rate, and passive joint torque terms increased by 15, 15, and 36%, respectively, when walking upright.  
394 Similarly, passive muscle forces increased when walking upright for the iliacus and psoas (hip flexors),  
395 and biceps femoris short head (knee flexor). Knee flexion increased when adding synergies but did not  
396 reach the angle that was experimentally measured in the child (Figure S6). Nevertheless, this suggests that  
397 reduced neuromuscular control complexity may contribute to crouch gait. The gastrocnemius lateralis and  
398 soleus (ankle plantarflexors) were also activated earlier during stance with synergies. Imposing synergies  
399 increased the COT (4.12 and  $4.05 \text{ J kg}^{-1} \text{ m}^{-1}$  with four and three synergies, respectively).

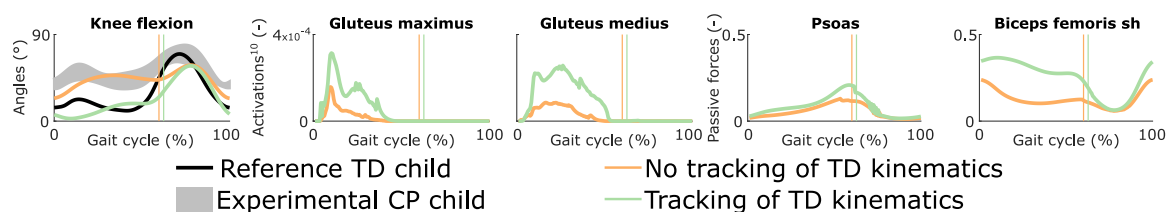

**Figure 6. Influence of tracking the TD kinematics on predicted walking gaits.** Variables from the right leg are shown over a complete gait cycle; left leg variables are shown in Figure S5 (Supplementary Material). Vertical lines indicate the transition from stance to swing. Experimental data is shown as mean  $\pm$  two standard deviations. Muscle fatigue is modeled by activations at the tenth power. Passive muscle forces are normalized by maximal isometric muscle forces. Sh is for short head. The influence of synergies on predicted walking gaits is depicted in Figure S6 (Supplementary Material).

## DISCUSSION

400 We demonstrated the ability of predictive simulations to explore the differential effects of musculoskeletal  
401 and motor control impairments on the gait pattern of a child with CP. In this specific case, aberrant  
402 musculoskeletal geometries and altered muscle-tendon properties explained the key gait deviation of  
403 the child, namely the crouch gait pattern. Accounting for aberrant geometries alone (i.e., MRI-based  
404 model with generic muscle-tendon parameters) did not result in a crouch gait pattern. Despite altered  
405 muscle-tendon properties and aberrant geometries, the model could still adopt a more upright gait pattern  
406 (TD kinematics tracking). Yet such pattern was less optimal as it induced higher muscle fatigue compared  
407 to the crouch gait pattern. These simulations thus suggest that adopting an upright gait pattern for this  
408 child might produce an early onset of fatigue, which might explain in part why the child walks in crouch.  
409 Importantly, not only fatigue, but also joint accelerations, passive joint torques, and metabolic energy rates  
410 increased with an upright gait pattern, likely contributing to the selection of a crouch gait pattern.

411 Decreasing the neuromuscular control complexity through a reduced number of synergies had a lower  
412 effect on the simulated gait patterns than muscular deficits as evaluated when comparing simulated gait

413 patterns obtained with personalized and generic muscle-tendon parameters. Nevertheless, the synergies  
414 resulted in increased knee flexion in several simulations, indicating that impaired selective motor control  
415 may contribute to gait deficits as suggested in prior simulation studies (Meharbi et al. (2019)). In this study,  
416 we imposed the number of synergies but not the synergy structure (synergy weights and activations were  
417 optimization variables and not informed by experimental data). We thus explored the effect of reducing the  
418 neuromuscular control complexity but not the impact of imposing the child's experimental synergies. We  
419 expect this impact to be limited for this child since he had a good selectivity. Nevertheless, further work  
420 should consider such investigation.

421 Our predictive simulations generated both movement patterns and the underlying synergies. Only  
422 imposing the number of synergies resulted in synergies that presented common features with those reported  
423 in the literature, such as one synergy activated during early stance and composed by the glutei and vasti,  
424 and one synergy activated during late stance consisting of the glutei, ankle plantarflexors, and iliacus (De  
425 Groote et al. (2014)). This suggests that synergy structures might emerge from mechanical constraints and  
426 performance optimization during walking. Future research should explore this hypothesis based on a larger  
427 population.

428 Decreasing the number of synergies resulted in a larger COT, as may be expected with a higher level  
429 of co-activations. This finding has been hypothesized in previous studies (Steele et al. (2017); Meharbi  
430 et al. (2019)) but not tested explicitly. It is indeed difficult to dissociate the influence of the neuromuscular  
431 control complexity on the COT through experiments or based on measured data, since many other factors  
432 (e.g., spasticity (Hemingway et al. (2001)) and weakness (van der Krogt et al. (2012))) might also play  
433 a role. Overall, our predictive simulations allow exploring the effects of isolated impairments on gait  
434 energetics, which was not possible through analyses based on measured data.

435 Spasticity had a minor influence on the predicted gait kinematics, suggesting a low impact of spasticity  
436 on gait performance for this child. This hypothesis is in agreement with several studies reporting a lack of  
437 correlation between spasticity as diagnosed during passive movements and determinants of gait (Ada et al.  
438 (1998); Marsden et al. (2012); Willerslev-Olsen et al. (2014)). However, it would be premature to draw  
439 such conclusion based on this analysis for a single child. First, spasticity was only taken into account for  
440 the medial hamstrings and gastrocnemii, whereas the rectus femoris and several hip flexors and adductors  
441 were also reported to be spastic (Table 1). Including these other muscles may have an influence on walking  
442 performance. Second, experimental data from the spasticity assessment was only collected for the right leg,  
443 whereas bilateral spasticity was reported (Table 1). We optimized the feedback parameters using that data  
444 but used the resulting parameters for both legs, which might affect our predictions. Third, we used feedback  
445 parameters optimized from passive stretches to predict spasticity (i.e., reflex activity) during gait, assuming  
446 no reflex modulation. This assumption is in line with the decreased reflex modulation reported for patients  
447 with spasticity (Sinkjaer et al. (1996); Faist et al. (1999); Dietz (2002); Dietz and Sinkjaer (2007)). Yet  
448 further research is needed to ensure that the same model is valid in passive and active conditions. Finally,  
449 the optimized feedback gains depend on EMG that was normalized using scale factors optimized during  
450 the muscle-tendon parameter estimation. However, these factors may not truly reflect the magnitude of  
451 the spastic responses, which may result in an under- or over-estimation of the predicted spastic activity  
452 during gait. In previous work (Falisse et al. (2018)), we showed that predicted spastic responses of the  
453 gastrocnemii were in agreement with large EMG signals observed in early stance in subjects with an  
454 equinus gait (i.e., toe walking). Interestingly, in this study, the child walked on his toes but we did not  
455 observe such EMG rise. Hence, our model predictions were in agreement with the lack of gastrocnemius  
456 EMG activity observed during early stance.



457 Our analysis suggests that muscle-tendon properties rather than selective motor control and spasticity  
458 should be the target of interventions aiming to restore an upright posture for this child. This suggestion is  
459 in line with the surgical report and one-year post-operative gait analysis. Specifically, the child underwent  
460 SEMLS consisting of bilateral rectus femoris transfer, distal femur extension and derotation osteotomy,  
461 tibia derotation, and patella distalization that successfully addressed the knee extension deficits and restored  
462 the upright gait pattern. The intervention also included bilateral BTX-A injections in the psoas (hip flexor)  
463 and gracilis (hip flexor, adductor, and knee flexor) to reduce spasticity. However, BTX-A injections are  
464 unlikely to have had an effect one year post-treatment (Molenaers et al. (2010)), suggesting a limited  
465 contribution of reduced psoas and gracilis spasticity on restored knee extension. Note that our study did  
466 not investigate the sensitivity of the predicted walking patterns to bone misalignment as we considered  
467 the same aberrant geometries for all analyses. Studying the effect of bone deformities on the gait pattern  
468 should be considered in future work.

469 Our simulations with personalized muscle-tendon parameters captured salient features of the child's  
470 walking pattern. Nevertheless, they deviated from measured data in different ways. In particular, our model  
471 did not adopt the observed equinus gait. Such pattern might have different underlying roots. On the one  
472 hand, it might be an ankle strategy to add functional limb length and compensate for the knee extension  
473 deficits. Our simulations did not predict such compensation strategy but also lacked knee flexion in early  
474 stance as compared to measured data (Figure 2). Increased knee flexion might strengthen the need for  
475 ankle compensation, causing the model to adopt an equinus gait. On the other hand, it might be due to  
476 contracture of the plantarflexors (Wren et al. (2005); Mathewson et al. (2015)) although this hypothesis is  
477 less likely for this child who had a normal ROM in terms of plantarflexion.

478 Other factors might have contributed to the deviations between predicted and measured movements.  
479 First, the musculoskeletal model had generic rather than subject-specific (i.e., MRI-based) geometries  
480 for feet and tibias. Since the child later underwent a surgery that included bilateral tibia derotation,  
481 these generic geometries might have contributed to the gait deviations. Second, the clinical examination  
482 indicated that the child's trunk was leaning forward. This is likely a compensation strategy, since no fixed  
483 lordosis was reported. However, our model had a very simple trunk representation (i.e., one joint with  
484 three DOFs), limiting the emergence of compensation strategies. Hence, our simulations resulted in an  
485 upright trunk posture, whereas a forward leaning posture might have caused an equinus gait. How to  
486 model the trunk to capture such compensations remains an open question. Third, our control strategy  
487 likely did not capture all complex control mechanisms that might be at play during gait. For instance,  
488 we did not consider in our cost function criteria such as head stability (Menz et al. (2003)) and pain that  
489 might contribute to gait control. Further, we designed our cost function based on previous work with  
490 a healthy adult but the same performance criterion might not hold for children with CP. Nevertheless,  
491 our cost function predicted, as expected, a crouch gait pattern with personalized parameters and a more  
492 upright gait pattern with generic parameters, suggesting that it captured at least part of the child's control  
493 strategy. Finally, the personalized muscle-tendon parameters might not accurately capture the effect of  
494 the child's altered muscle-tendon properties. In previous work (Falisse et al. (2017)), we underlined the  
495 importance of incorporating experimental data from multiple functional movements when calibrating  
496 muscle-tendon parameters in order to obtain valid parameter estimates (i.e., representative of the subject).  
497 In this study, the available experimental data was limited to walking trials and passive stretches from one  
498 leg. Hence, it is likely that some parameters were calibrated to fit the experimental data but did not truly  
499 reflect the force-generating capacities of the child. When used in conditions different from the experiments,  
500 these parameters may hence result in non-representative force predictions. A challenge for upcoming  
501 research will be the design of experimental protocols to collect experimental data that contains sufficient

502 information for providing valid muscle-tendon parameter estimates while accounting for physiological  
503 limitations of impaired individuals and practical limitations of clinical contexts. It is also worth noting  
504 that our parameter estimation procedure only adjusted optimal fiber lengths and tendon slack lengths,  
505 whereas other parameters may need to be personalized, such as maximal isometric muscle forces, tendon  
506 compliance, or maximal muscle contraction velocities. The muscle force-length-velocity relationships  
507 might also be altered in children with CP due to their longer sarcomere lengths. Overall, further tuning  
508 of the neuro-musculoskeletal model and validation of the simulation framework outcome with a large  
509 population are necessary for augmenting the representativeness of the simulations.

## CONCLUSION

510 This study suggests that predictive simulations are able to identify the main treatment targets for specific  
511 patients. In particular, our results showed that, in the presence of aberrant musculoskeletal geometries,  
512 altered muscle-tendon properties rather than reduced neuromuscular control complexity and spasticity were  
513 the primary driver of the impaired crouch gait pattern observed for the child with CP of this study. Based  
514 on this observation, we would recommend altered muscle-tendon properties to be the primary target of  
515 clinical interventions aiming to restore a more upright posture, which is in line with the surgical report  
516 and one-year post-operative gait analysis. Validation of our simulation workflow through analysis of many  
517 more cases is, however, necessary to build confidence in the simulation outcomes. Overall, these results  
518 open the door for predicting the functional outcome of treatments on walking performance by allowing *in*  
519 *silico* assessment of the effect of changes in the neuro-musculoskeletal system on the gait pattern.

## CONFLICT OF INTEREST STATEMENT

520 The authors declare that the research was conducted in the absence of any commercial or financial  
521 relationships that could be construed as a potential conflict of interest.

## AUTHOR CONTRIBUTIONS

522 AF, FDG, and IJ conceptualized the methods; AF, LP, HK, MW, SVR, HH, EP, and LBO processed the  
523 data; AF performed the formal analysis; AF, HK, LBO, AH, KD, GM, AVC, FDG, and IJ acquired funding;  
524 AF, FDG, and IJ conducted the investigation; AF and FDG developed the methodology; AH, KD, GM,  
525 AVC, FDG, and IJ administrated the project; EP, LBO, AH, KD, GM, and AVC provided resources; AF  
526 developed the software; FDG and IJ supervised the project; AF, FDG, and IJ validated the research outputs;  
527 AF prepared the data visualization; AF drafted the manuscript; and all authors edited the manuscript.

## FUNDING

528 This work was supported by the IWT-TBM grant SimCP (140184). AF also received a Ph.D. grant  
529 (1S35416N) from the Research Foundation Flanders (FWO). HK received a H2020-MSCA individual  
530 fellowship (796120). LBO received a postdoctoral grant (12R4215N) from the Research Foundation  
531 Flanders (FWO) and a grant (016.186.144) from the Netherlands Organisation for Scientific Research  
532 (NWO).

## DATA AVAILABILITY STATEMENT

533 All data, code, and materials used in this study will be made available at [https://simtk.org/](https://simtk.org/projects/predictcpgait)  
534 [projects/predictcpgait](https://simtk.org/projects/predictcpgait) upon publication.

## REFERENCES

- 535 Ada, L., Vattanasilp, W., O'Dwyer, N. J., and Crosbie, J. (1998). Does spasticity contribute to walking  
536 dysfunction after stroke? *Journal of neurology, neurosurgery, and psychiatry* 64, 628–635. doi:10.1136/  
537 jnnp.64.5.628
- 538 Anderson, F. C. and Pandy, M. G. (2001). Dynamic optimization of human walking. *Journal of*  
539 *Biomechanical Engineering* 123, 381–390. doi:10.1115/1.1392310
- 540 Andersson, J. A. E., Gillis, J., Horn, G., Rawlings, J. B., and Diehl, M. (2019). CasADi : a software  
541 framework for nonlinear optimization and optimal control. *Mathematical Programming Computation*  
542 11, 1–36. doi:10.1007/s12532-018-0139-4
- 543 Arnold, A. S., Blemker, S. S., and Delp, S. L. (2001). Evaluation of a deformable musculoskeletal model  
544 for estimating muscle-tendon lengths during crouch gait. *Annals of Biomedical Engineering* 29, 263–274.  
545 doi:10.1114/1.1355277
- 546 Bar-On, L., Aertbeliën, E., Wambacq, H., Severijns, D., Lambrecht, K., Dan, B., et al. (2013). A clinical  
547 measurement to quantify spasticity in children with cerebral palsy by integration of multidimensional  
548 signals. *Gait and Posture* 38, 141–147. doi:10.1016/j.gaitpost.2012.11.003
- 549 Barber, L., Barrett, R., and Lichtwark, G. (2011a). Passive muscle mechanical properties of the medial  
550 gastrocnemius in young adults with spastic cerebral palsy. *Journal of Biomechanics* 44, 2496–2500.  
551 doi:10.1016/j.jbiomech.2011.06.008
- 552 Barber, L., Barrett, R., and Lichtwark, G. (2012). Medial gastrocnemius muscle fascicle active torque-length  
553 and Achilles tendon properties in young adults with spastic cerebral palsy. *Journal of Biomechanics* 45,  
554 2526–2530. doi:10.1016/j.jbiomech.2012.07.018
- 555 Barber, L., Hastings-Ison, T., Baker, R., Barrett, R., and Lichtwark, G. (2011b). Medial gastrocnemius  
556 muscle volume and fascicle length in children aged 2 to 5 years with cerebral palsy. *Developmental*  
557 *Medicine and Child Neurology* 53, 543–548. doi:10.1111/j.1469-8749.2011.03913.x
- 558 Barrett, R. S. and Lichtwark, G. a. (2010). Gross muscle morphology and structure in spastic cerebral  
559 palsy: a systematic review. *Developmental Medicine and Child Neurology* 52, 794–804. doi:10.1111/j.  
560 1469-8749.2010.03686.x
- 561 Bhargava, L. J., Pandy, M. G., and Anderson, F. C. (2004). A phenomenological model for estimating  
562 metabolic energy consumption in muscle contraction. *Journal of Biomechanics* 37, 81–88. doi:10.1016/  
563 S0021-9290(03)00239-2
- 564 Bosmans, L., Wesseling, M., Desloovere, K., Molenaers, G., Scheys, L., and Jonkers, I. (2014). Hip  
565 contact force in presence of aberrant bone geometry during normal and pathological gait. *Journal of*  
566 *Orthopaedic Research* 32, 1406–1415. doi:10.1002/jor.22698
- 567 Chang, F. M., Seidl, A. J., Muthusamy, K., Meininger, A. K., and Carollo, J. J. (2006). Effectiveness  
568 of instrumented gait analysis in children with cerebral palsy - Comparison of outcomes. *Journal of*  
569 *Pediatric Orthopaedics* 26, 612–616. doi:10.1097/01.bpo.0000229970.55694.5c
- 570 De Groote, F., Jonkers, I., and Duysens, J. (2014). Task constraints and minimization of muscle effort  
571 result in a small number of muscle synergies during gait. *Frontiers in Computational Neuroscience* 8,  
572 1–11. doi:10.3389/fncom.2014.00115

- 573 De Groote, F., Kinney, A., Rao, A., and Fregly, B. (2016). Evaluation of direct collocation optimal control  
574 problem formulations for solving the muscle redundancy problem. *Annals of Biomedical Engineering*  
575 44, 2922–2936. doi:10.1007/s10439-016-1591-9
- 576 De Groote, F., Pipeleers, G., Jonkers, I., Demeulenaere, B., Patten, C., Swevers, J., et al. (2009). A  
577 physiology based inverse dynamic analysis of human gait: potential and perspectives. *Computer Methods*  
578 *in Biomechanics and Biomedical Engineering* 12, 563–574. doi:10.1080/10255840902788587
- 579 De Groote, F., Van Campen, A., Jonkers, I., and De Schutter, J. (2010). Sensitivity of dynamic simulations  
580 of gait and dynamometer experiments to hill muscle model parameters of knee flexors and extensors.  
581 *Journal of Biomechanics* 43, 1876–1883. doi:10.1016/j.jbiomech.2010.03.022
- 582 Delp, S., Anderson, F., Arnold, A., Loan, P., Habib, A., John, C., et al. (2007). OpenSim: open-source  
583 software to create and analyze dynamic simulations of movement. *IEEE Transactions on Biomedical*  
584 *Engineering* 54, 1940–1950. doi:10.1109/TBME.2007.901024
- 585 Delp, S., Loan, P., Hoy, M., Zajac, F., Topp, E., and Rosen, J. (1990). An interactive graphics-based model  
586 of the lower extremity to study orthopaedic surgical procedures. *IEEE Transactions on Biomedical*  
587 *Engineering* 37, 757 – 67. doi:10.1109/10.102791
- 588 Desloovere, K., Molenaers, G., Feys, H., Huenaearts, C., Callewaert, B., and Van de Walle, P. (2006).  
589 Do dynamic and static clinical measurements correlate with gait analysis parameters in children with  
590 cerebral palsy? *Gait and Posture* 24, 302–313. doi:10.1016/j.gaitpost.2005.10.008
- 591 Dietz, V. (2002). Proprioception and locomotor disorders. *Nature Reviews Neuroscience* 3, 781–790.  
592 doi:10.1038/nrn939
- 593 Dietz, V. and Sinkjaer, T. (2007). Spastic movement disorder: impaired reflex function and altered muscle  
594 mechanics. *Lancet Neurology* 6, 725–733. doi:10.1016/S1474-4422(07)70193-X
- 595 Faist, M., Ertel, M., Berger, W., and Dietz, V. (1999). Impaired modulation of quadriceps tendon  
596 jerk reflex during spastic gait: differences between spinal and cerebral lesions. *Brain* 122, 567–579.  
597 doi:10.1093/brain/122.3.567
- 598 Falisse, A., Bar-On, L., Desloovere, K., Jonkers, I., and De Groote, F. (2018). A spasticity model based on  
599 feedback from muscle force explains muscle activity during passive stretches and gait in children with  
600 cerebral palsy. *Plos One* 13, e0208811. doi:10.1371/journal.pone.0208811
- 601 Falisse, A., Serrancolí, G., Dembia, C. L., Gillis, J., Jonkers, I., and De Groote, F. (2019). Rapid predictive  
602 simulations with complex musculoskeletal models suggest that diverse healthy and pathological human  
603 gaits can emerge from similar control strategies. *Journal of The Royal Society Interface* 16, 20190402.  
604 doi:10.1098/rsif.2019.0402
- 605 Falisse, A., Van Rossom, S., Jonkers, I., and De Groote, F. (2017). EMG-driven optimal estimation of  
606 subject-specific Hill model muscle-tendon parameters of the knee joint actuators. *IEEE Transactions on*  
607 *Biomedical Engineering* 64, 2253–2262. doi:10.1109/TBME.2016.2630009
- 608 Filho, M. C. d. M., Yoshida, R., Carvalho, W. d. S., Stein, H. E., and Novo, N. F. (2008). Are the  
609 recommendations from three-dimensional gait analysis associated with better postoperative outcomes in  
610 patients with cerebral palsy? *Gait and Posture* 28, 316–322. doi:10.1016/j.gaitpost.2008.01.013
- 611 Gage, J. R., Schwartz, M. H., Koop, S. E., and Novacheck, T. F. (eds.) (2009). *The identification and*  
612 *treatment of gait problems in cerebral palsy* (Mac Keith Press), 2nd edn.
- 613 Hemingway, C., McGrogan, J., and Freeman, J. M. (2001). Energy requirements of spasticity.  
614 *Developmental Medicine and Child Neurology* 43, 277. doi:10.1017/s0012162201000524
- 615 Ivanenko, Y. P., Poppele, R. E., and Lacquaniti, F. (2004). Five basic muscle activation patterns account  
616 for muscle activity during human locomotion. *The Journal of Physiology* 556, 267–282. doi:10.1113/  
617 jphysiol.2003.057174



- 618 Kim, Y., Bulea, T. C., and Damiano, D. L. (2018). Children with cerebral palsy have greater stride-  
619 to-stride variability of muscle synergies during gait than typically developing children: implications  
620 for motor control complexity. *Neurorehabilitation and Neural Repair* 32, 834–844. doi:10.1177/  
621 1545968318796333
- 622 Lance, J. (1980). Pathophysiology of spasticity and clinical experience with baclofen. In *Spasticity:*  
623 *Disordered Motor Control*, eds. J. Lance, R. Feldman, R. Young, and W. Koella (Chicago: Year Book  
624 Medical). 185–204
- 625 Lin, Y.-C., Walter, J. P., and Pandy, M. G. (2018). Predictive simulations of neuromuscular coordination  
626 and joint-contact loading in human gait. *Annals of Biomedical Engineering* 46, 1216–1227. doi:10.  
627 1007/s10439-018-2026-6
- 628 Lloyd, D. G. and Besier, T. F. (2003). An EMG-driven musculoskeletal model to estimate muscle forces  
629 and knee joint moments in vivo. *Journal of Biomechanics* 36, 765–776. doi:10.1016/S0021-9290(03)  
630 00010-1
- 631 Marsden, J., Ramdharry, G., Stevenson, V., and Thompson, A. (2012). Muscle paresis and passive stiffness:  
632 key determinants in limiting function in hereditary and sporadic spastic paraparesis. *Gait and Posture*  
633 35, 266–271. doi:10.1016/j.gaitpost.2011.09.018
- 634 Mathewson, M. a., Ward, S. R., Chambers, H. G., and Lieber, R. L. (2015). High resolution muscle  
635 measurements provide insights into equinus contractures in patients with cerebral palsy. *Journal of*  
636 *Orthopaedic Research* 33, 33–39. doi:10.1002/jor.22728
- 637 McGinley, J. L., Dobson, F., Ganeshalingam, R., Shore, B. J., Rutz, E., and Graham, H. K. (2012).  
638 Single-event multilevel surgery for children with cerebral palsy: A systematic review. *Developmental*  
639 *Medicine and Child Neurology* 54, 117–128. doi:10.1111/j.1469-8749.2011.04143.x
- 640 Meharbi, N., Schwartz, M. H., and Steele, K. M. (2019). Can Altered Muscle Synergies Control Unimpaired  
641 Gait? *Journal of Biomechanics* In press. doi:10.1016/j.jbiomech.2019.04.038
- 642 Menz, H. B., Lord, S. R., and Fitzpatrick, R. C. (2003). Acceleration patterns of the head and pelvis  
643 when walking on level and irregular surfaces. *Gait and Posture* 18, 35–46. doi:10.1016/S0966-6362(02)  
644 00159-5
- 645 Miller, R. H. (2014). A comparison of muscle energy models for simulating human walking in three  
646 dimensions. *Journal of Biomechanics* 47, 1373–1381. doi:10.1016/j.jbiomech.2014.01.049
- 647 Molenaers, G., van Campenhout, A., Fagard, K., De Cat, J., and Desloovere, K. (2010). The use of  
648 botulinum toxin A in children with cerebral palsy, with a focus on the lower limb. *Journal of Children's*  
649 *Orthopaedics* 4, 183–195. doi:10.1007/s11832-010-0246-x
- 650 Raasch, C. C., Zajac, F. E., Ma, B., and Levine, W. S. (1997). Muscle coordination of maximum-speed  
651 pedaling. *Journal of Biomechanics* 30, 595–602. doi:10.1016/S0021-9290(96)00188-1
- 652 Rajagopal, A., Kidziński, Ł., McGlaughlin, A. S., Hicks, J. L., Delp, S. L., and Schwartz, M. H. (2018).  
653 Estimating the effect size of surgery to improve walking in children with cerebral palsy from retrospective  
654 observational clinical data. *Scientific Reports* 8, 1–11. doi:10.1038/s41598-018-33962-2
- 655 Scheys, L., Desloovere, K., Spaepen, A., Suetens, P., and Jonkers, I. (2011a). Calculating gait kinematics  
656 using MR-based kinematic models. *Gait and Posture* 33, 158–164. doi:10.1016/j.gaitpost.2010.11.003
- 657 Scheys, L., Desloovere, K., Suetens, P., and Jonkers, I. (2011b). Level of subject-specific detail in  
658 musculoskeletal models affects hip moment arm length calculation during gait in pediatric subjects with  
659 increased femoral anteversion. *Journal of Biomechanics* 44, 1346–1353. doi:10.1016/j.jbiomech.2011.  
660 01.001

- 661 Scheys, L., Loeckx, D., Spaepen, A., Suetens, P., and Jonkers, I. (2009). Atlas-based non-rigid image  
662 registration to automatically define line-of-action muscle models: A validation study. *Journal of*  
663 *Biomechanics* 42, 565–572. doi:10.1016/j.jbiomech.2008.12.014
- 664 Scheys, L., Van Campenhout, A., Spaepen, A., Suetens, P., and Jonkers, I. (2008). Personalized MR-based  
665 musculoskeletal models compared to rescaled generic models in the presence of increased femoral  
666 anteversion: effect on hip moment arm lengths. *Gait and Posture* 28, 358–365. doi:10.1016/j.gaitpost.  
667 2008.05.002
- 668 Schwartz, M. H. (2018). O 046 - A flexible omnibus matching algorithm (FOMA) to support treatment  
669 decisions for children with cerebral palsy. *Gait and Posture* 65, 93–94. doi:10.1016/j.gaitpost.2018.06.  
670 064
- 671 Schwartz, M. H., Rozumalski, A., and Steele, K. M. (2016). Dynamic motor control is associated with  
672 treatment outcomes for children with cerebral palsy. *Developmental Medicine and Child Neurology* 58,  
673 1139–1145. doi:10.1111/dmcn.13126
- 674 Sherman, M. A., Seth, A., and Delp, S. L. (2011). Simbody: multibody dynamics for biomedical research.  
675 *Procedia IUTAM* 2, 241–261. doi:10.1016/j.piutam.2011.04.023
- 676 Shuman, B. R., Goudriaan, M., Desloovere, K., Schwartz, M. H., and Steele, K. M. (2019). Muscle syner-  
677 gies demonstrate only minimal changes after treatment in cerebral palsy. *Journal of NeuroEngineering*  
678 *and Rehabilitation* 16, 1–10. doi:10.1186/s12984-019-0502-3
- 679 Sinkjaer, T., Andersen, J. B., and Nielsen, J. F. (1996). Impaired stretch reflex and joint torque modulation  
680 during spastic gait in multiple sclerosis patients. *Journal of Neurology* 243, 566–574. doi:10.1007/  
681 BF00900943
- 682 Smith, L. R., Lee, K. S., Ward, S. R., Chambers, H. G., and Lieber, R. L. (2011). Hamstring contractures  
683 in children with spastic cerebral palsy result from a stiffer extracellular matrix and increased in vivo  
684 sarcomere length. *The Journal of physiology* 589, 2625–2639. doi:10.1113/jphysiol.2010.203364
- 685 Song, S. and Geyer, H. (2015). A neural circuitry that emphasizes spinal feedback generates diverse  
686 behaviours of human locomotion. *Journal of Physiology* 593, 3493–3511. doi:10.1113/JP270228
- 687 Song, S. and Geyer, H. (2018). Predictive neuromechanical simulations indicate why walking performance  
688 declines with ageing. *Journal of Physiology* 596, 1199–1210. doi:10.1113/JP275166
- 689 Staude, G. and Wolf, W. (1999). Objective motor response onset detection in surface myoelectric signals.  
690 *Medical Engineering and Physics* 21, 449–467. doi:10.1016/S1350-4533(99)00067-3
- 691 Steele, K. M., Rozumalski, A., and Schwartz, M. H. (2015). Muscle synergies and complexity of  
692 neuromuscular control during gait in cerebral palsy. *Developmental Medicine & Child Neurology* in  
693 press. doi:10.1111/dmcn.12826
- 694 Steele, K. M., Shuman, B. R., and Schwartz, M. H. (2017). Crouch severity is a poor predictor of elevated  
695 oxygen consumption in cerebral palsy. *Journal of Biomechanics* 60, 170–174. doi:10.1016/j.jbiomech.  
696 2017.06.036
- 697 Surveillance of Cerebral Palsy in Europe (2002). Prevalence and characteristics of children with cere-  
698 bral palsy in Europe. *Developmental Medicine and Child Neurology* 44, 633–40. doi:10.1017/  
699 S0012162201002675
- 700 Uchida, T. K., Hicks, J. L., Dembia, C. L., and Delp, S. L. (2016). Stretching your energetic budget: how  
701 tendon compliance affects the metabolic cost of running. *PLoS ONE* 11, e0150378. doi:10.1371/journal.  
702 pone.0150378
- 703 van den Bogert, A., Geijtenbeek, T., Even-Zohar, O., Steenbrink, F., and Hardin, E. (2013). A real-time  
704 system for biomechanical analysis of human movement and muscle function. *Medical & biological*  
705 *engineering & computing* 51, 1069–77. doi:10.1007/s11517-013-1076-z

- 706 van der Krogt, M. M., Bar-On, L., Kindt, T., Desloovere, K., and Harlaar, J. (2016). Neuro-musculoskeletal  
707 simulation of instrumented contracture and spasticity assessment in children with cerebral palsy. *Journal*  
708 *of NeuroEngineering and Rehabilitation* 13, 64. doi:10.1186/s12984-016-0170-5
- 709 van der Krogt, M. M., Delp, S. L., and Schwartz, M. H. (2012). How robust is human gait to muscle  
710 weakness? *Gait and Posture* 36, 113–119. doi:10.1016/j.gaitpost.2012.01.017
- 711 Wächter, A. and Biegler, L. T. (2006). On the implementation of an interior-point filter line-search  
712 algorithm for large-scale nonlinear programming. *Mathematical Programming* 106, 25–57. doi:10.1007/  
713 s10107-004-0559-y
- 714 Willerslev-Olsen, M., Andersen, J. B., Sinkjaer, T., and Nielsen, J. B. (2014). Sensory feedback to ankle  
715 plantar flexors is not exaggerated during gait in spastic hemiplegic children with cerebral palsy. *Journal*  
716 *of Neurophysiology* 111, 746–754. doi:10.1152/jn.00372.2013
- 717 Wren, T. A. L., Rethlefsen, S., and Kay, R. M. (2005). Prevalence of specific gait abnormali-  
718 ties in children with cerebral palsy. *Journal of Pediatric Orthopaedics* 25, 79–83. doi:10.1097/  
719 00004694-200501000-00018
- 720 Zajac, F. (1989). Muscle and tendon: properties, models, scaling, and application to biomechanics and  
721 motor control. *Critical Reviews in Biomedical Engineering* 17, 359–411
